# Supplementary material for: Incidence and Risk Factors for Development of Cardiac Toxicity in Adult Patients with Newly Diagnosed Acute Myeloid Leukemia
Source: MDPI journal article supplement (doi:10.3390/cancers15082267), 2023-04-12

## Supplementary material: Incidence and risk factors for development of cardiac toxicity in adult patients with newly diagnosed acute myeloid leukemia

**Supplementary Table S1. Baseline cardiac characteristics in all patients**

| Characteristic               | Overall cohort |                              |
|------------------------------|----------------|------------------------------|
|                              | Median (range) | Number of patients n=571 (%) |
| Relevant cardiac comorbidity |                | 571                          |
| Yes                          |                | 82 (14)                      |
| No                           |                | 489 (86)                     |
| All cardiac comorbidity      |                | 571                          |
| Yes                          |                | 215 (38)                     |
| No                           |                | 356 (62)                     |
| Baseline cardiac medication  |                | 571                          |
| Yes                          |                | 265 (46)                     |
| No                           |                | 306 (54)                     |
| Baseline cardiac medication  | 0 (0-9)        | 571                          |
| 0                            |                | 306 (54)                     |
| 1-2                          |                | 176 (31)                     |

|                                     |               |          |
|-------------------------------------|---------------|----------|
| 3-4                                 |               | 73 (13)  |
| >4                                  |               | 16 (3)   |
| Baseline electrocardiogram          |               | 571      |
| Normal                              |               | 278 (49) |
| Abnormal non clinically significant |               | 128 (22) |
| Abnormal clinically significant     |               | 17 (3)   |
| Not available                       |               | 148 (26) |
| Baseline QTcF electrocardiogram     | 421 (347-556) | 409      |
| QTcF <450                           |               | 359 (88) |
| QTcF 450-480                        |               | 38 (9)   |
| QTcF 481-500                        |               | 7 (2)    |
| QTcF >500                           |               | 5 (1)    |
| Baseline echocardiogram             |               | 571      |
| Normal                              |               | 242 (42) |
| Abnormal                            |               | 70 (12)  |
| Not available                       |               | 259 (45) |
| Baseline ejection fraction          | 66 (35-92)    | 221      |
| LVEF <50                            |               | 6 (3)    |
| LVEF ≥50                            |               | 215 (97) |



|                      |            |              |            |        |            |          |            |         |            |              |            |         |        |
|----------------------|------------|--------------|------------|--------|------------|----------|------------|---------|------------|--------------|------------|---------|--------|
| <b>N</b>             |            | 218<br>(46%) |            | 7 (1%) |            | 68 (13%) |            | 67 (13) |            | 165<br>(31%) |            | 46 (9%) |        |
| <b>Age, years</b>    | 54 (18-68) | 218          | 69 (49-78) | 7      | 71 (51-91) | 68       | 63 (29-72) | 67      | 74 (57-98) | 165          | 77 (54-94) | 46      | <0.001 |
| <65                  |            | 210 (96)     |            | 3 (43) |            | 7 (10)   |            | 40 (60) |            | 4 (2)        |            | 8 (17)  | <0.001 |
| ≥65-<75              |            | 8 (4)        |            | 1 (14) |            | 35 (51)  |            | 27 (40) |            | 79 (48)      |            | 10 (22) |        |
| ≥75                  |            | 0            |            | 3 (43) |            | 26 (38)  |            | 0       |            | 82 (50)      |            | 28 (61) |        |
| <b>Gender</b>        |            | 218          |            | 7      |            | 68       |            | 67      |            | 165          |            | 46      |        |
| Male                 |            | 121 (56)     |            | 5 (71) |            | 42 (62)  |            | 40 (60) |            | 97 (59)      |            | 26 (57) | 0.897  |
| Female               |            | 97 (45)      |            | 2 (29) |            | 26 (38)  |            | 27 (40) |            | 68 (41)      |            | 20 (43) |        |
| <b>ECOG</b>          | 1 (0-4)    | 218          | 1 (0-2)    | 7      | 1 (0-4)    | 68       | 0 (0-3)    | 67      | 1 (0-4)    | 165          | 3 (0-4)    | 46      | <0.001 |
| 0                    |            | 101 (46)     |            | 3 (43) |            | 16 (24)  |            | 35 (52) |            | 47 (28)      |            | 2 (4)   | <0.001 |
| 1                    |            | 85 (39)      |            | 2 (29) |            | 22 (32)  |            | 28 (42) |            | 79 (48)      |            | 12 (26) |        |
| 2                    |            | 24 (11)      |            | 2 (29) |            | 17 (25)  |            | 3 (4)   |            | 28 (17)      |            | 7 (15)  |        |
| 3                    |            | 5 (2)        |            | 0      |            | 6 (10)   |            | 1 (1)   |            | 10 (6)       |            | 11 (24) |        |
| 4                    |            | 3 (1)        |            | 0      |            | 7 (10)   |            | 0       |            | 1 (1)        |            | 14 (30) |        |
| <b>ECOG Group</b>    |            | 218          |            | 7      |            | 68       |            | 67      |            | 165          |            | 46      |        |
| 0-1                  |            | 186 (85)     |            | 5 (71) |            | 38 (56)  |            | 63 (94) |            | 126 (76)     |            | 14 (30) | <0.001 |
| ≥2                   |            | 32 (15)      |            | 2 (29) |            | 31 (44)  |            | 4 (6)   |            | 39 (24)      |            | 32 (70) |        |
| <b>Comorbidities</b> |            | 218          |            | 7      |            | 68       |            | 67      |            | 165          |            | 46      |        |
| Yes                  |            | 108 (50)     |            | 5 (71) |            | 52 (76)  |            | 40 (60) |            | 131 (79)     |            | 42 (91) | <0.001 |
| No                   |            | 110 (50)     |            | 2 (29) |            | 16 (24)  |            | 27 (40) |            | 34 (21)      |            | 4 (9)   |        |
| <b>Type of AML</b>   |            | 217          |            | 7      |            | 67       |            | 66      |            | 164          |            | 46      |        |
| <i>De novo</i>       |            | 158 (73)     |            | 1 (14) |            | 31 (46)  |            | 44 (67) |            | 94 (57)      |            | 20 (43) | <0.001 |
| Secondary to MDS/MPs |            | 25 (12)      |            | 6 (86) |            | 21 (31)  |            | 14 (21) |            | 48 (29)      |            | 18 (39) |        |
| Therapy related      |            | 34 (16)      |            | 0      |            | 15 (22)  |            | 8 (12)  |            | 22 (13)      |            | 8 (17)  |        |

|                               |                |          |              |         |                 |         |                 |         |                 |          |                |         |        |
|-------------------------------|----------------|----------|--------------|---------|-----------------|---------|-----------------|---------|-----------------|----------|----------------|---------|--------|
| <b>FAB subtype</b>            |                | 204      |              | 6       |                 | 64      |                 | 48      |                 | 134      |                | 35      |        |
| M0                            |                | 10 (5)   |              | 0       |                 | 5 (8)   |                 | 2 (4)   |                 | 10 (7)   |                | 2 (6)   | 0.002  |
| M1                            |                | 35 (17)  |              | 0       |                 | 6 (9)   |                 | 16 (33) |                 | 14 (10)  |                | 1 (3)   |        |
| M2                            |                | 42 (21)  |              | 0       |                 | 11 (17) |                 | 4 (8)   |                 | 27 (20)  |                | 4 (11)  |        |
| M4                            |                | 36 (18)  |              | 0       |                 | 9 (14)  |                 | 8 (17)  |                 | 23 (17)  |                | 7 (20)  |        |
| M5                            |                | 28 (14)  |              | 0       |                 | 7 (11)  |                 | 6 (13)  |                 | 10 (7)   |                | 4 (11)  |        |
| M6                            |                | 10 (5)   |              | 1 (17)  |                 | 2 (3)   |                 | 1 (2)   |                 | 8 (6)    |                | 0       |        |
| M7                            |                | 2 (1)    |              | 0       |                 | 0       |                 | 0       |                 | 2 (1)    |                | 1 (3)   |        |
| NA/other                      |                | 41 (20)  |              | 5 (83)  |                 | 24 (38) |                 | 11 (23) |                 | 40 (30)  |                | 16 (46) |        |
| <b>WHO 2016</b>               |                | 218      |              | 7       |                 | 68      |                 | 67      |                 | 164      |                | 46      |        |
| AML-RGA                       |                | 91 (42)  |              | 0       |                 | 14 (21) |                 | 23 (34) |                 | 24 (15)  |                | 2 (4)   | <0.001 |
| AML-NOS                       |                | 29 (13)  |              | 0       |                 | 8 (12)  |                 | 5 (7)   |                 | 23 (14)  |                | 3 (7)   |        |
| AML-MRC                       |                | 62 (28)  |              | 6 (86)  |                 | 30 (44) |                 | 26 (39) |                 | 86 (52)  |                | 30 (65) |        |
| Myeloid sarcoma               |                | 1 (0.5)  |              | 0       |                 | 0       |                 | 0       |                 | 1 (1)    |                | 0       |        |
| t-AML                         |                | 18 (8)   |              | 0       |                 | 13 (19) |                 | 5 (7)   |                 | 11 (7)   |                | 5 (11)  |        |
| Ambiguous lineage             |                | 4 (2)    |              | 0       |                 | 1 (1)   |                 | 1 (1)   |                 | 2 (1)    |                | 0       |        |
| BPDCN                         |                | 0        |              | 0       |                 | 0       |                 | 0       |                 | 2 (1)    |                | 0       |        |
| Not available                 |                | 13 (6)   |              | 1 (14)  |                 | 2 (3)   |                 | 7 (10)  |                 | 15 (9)   |                | 6 (13)  |        |
| <b>Extramedullary disease</b> |                | 217      |              | 7       |                 | 68      |                 | 67      |                 | 164      |                | 46      |        |
| Yes                           |                | 48 (22)  |              | 0       |                 | 9 (13)  |                 | 11 (16) |                 | 27 (16)  |                | 5 (11)  | 0.213  |
| No                            |                | 169 (78) |              | 7 (100) |                 | 59 (87) |                 | 56 (84) |                 | 137 (84) |                | 41 (89) |        |
| <b>WBC, ×10<sup>9</sup>/L</b> | 10 (0.4-434.3) | 218      | 2.7 (0.5-75) | 7       | 8.9 (0.4-317.9) | 68      | 6.8 (0.3-246.4) | 67      | 5.7 (0.6-223.6) | 165      | 13.7 (0.3-202) | 46      | 0.041  |
| ≤ 5                           |                | 87 (40)  |              | 5 (71)  |                 | 27 (40) |                 | 30 (45) |                 | 82 (50)  |                | 10 (22) | 0.07   |

|                                            |                |          |                |        |                |         |                |         |                |          |                |         |        |
|--------------------------------------------|----------------|----------|----------------|--------|----------------|---------|----------------|---------|----------------|----------|----------------|---------|--------|
| 5-10                                       |                | 22 (10)  |                | 1 (14) |                | 10 (15) |                | 8 (12)  |                | 18 (11)  |                | 9 (20)  |        |
| 10-50                                      |                | 62 (28)  |                | 0      |                | 15 (22) |                | 14 (21) |                | 45 (27)  |                | 17 (37) |        |
| > 50                                       |                | 47 (22)  |                | 1 (14) |                | 16 (24) |                | 15 (22) |                | 20 (12)  |                | 10 (22) |        |
| <b>Neutrophil count, ×10<sup>9</sup>/L</b> |                | 204      |                | 5      |                | 66      |                | 52      |                | 142      |                | 38      |        |
| ≤ 0.5                                      |                | 69 (34)  |                | 2 (40) |                | 20 (30) |                | 20 (38) |                | 37 (26)  |                | 10 (26) | 0.27   |
| 0.5-1                                      |                | 38 (19)  |                | 2 (40) |                | 11 (17) |                | 5 (10)  |                | 24 (17)  |                | 3 (8)   |        |
| > 1                                        |                | 97 (48)  |                | 1 (20) |                | 35 (53) |                | 27 (52) |                | 81 (57)  |                | 25 (66) |        |
| <b>Hemoglobin, g/dL</b>                    | 8.8 (3.8-15.5) | 218      | 8.8 (6.9-14.3) | 7      | 8.9 (4.8-13.9) | 68      | 9.1 (5.3-13.1) | 67      | 8.6 (3.8-14.2) | 165      | 8.6 (2.9-12.7) | 46      | 0.53   |
| ≤ 10                                       |                | 159 (73) |                | 5 (71) |                | 52 (76) |                | 49 (73) |                | 134 (81) |                | 35 (76) | 0.55   |
| > 10                                       |                | 59 (27)  |                | 2 (29) |                | 16 (24) |                | 18 (27) |                | 31 (19)  |                | 11 (24) |        |
| <b>Platelet count, ×10<sup>9</sup>/L</b>   | 53 (2-1442)    | 218      | 54 (9-816)     | 7      | 42 (1-599)     | 68      | 73 (9-330)     | 67      | 54 (7-708)     | 165      | 32 (5-613)     | 45      | 0.004  |
| ≤ 20                                       |                | 34 (16)  |                | 2 (29) |                | 21 (31) |                | 7 (10)  |                | 30 (18)  |                | 15 (33) | 0.004  |
| > 20                                       |                | 184 (84) |                | 5 (71) |                | 47 (69) |                | 60 (90) |                | 135 (82) |                | 30 (67) |        |
| <b>PB blasts, %</b>                        |                | 214      |                | 7      |                | 68      |                | 67      |                | 163      |                | 44      |        |
| ≤ 50                                       |                | 146 (68) |                | 6 (86) |                | 49 (72) |                | 46 (69) |                | 137 (84) |                | 33 (75) | 0.016  |
| > 50                                       |                | 68 (32)  |                | 1 (14) |                | 19 (28) |                | 21 (31) |                | 26 (16)  |                | 11 (25) |        |
| <b>BM blasts, %</b>                        | 58 (0-100)     | 216      | 28 (21-90)     | 7      | 57 (8-100)     | 67      | 50 (18-99)     | 67      | 38 (1-100)     | 165      | 37 (20-99)     | 37      | <0.001 |
| ≤ 30                                       |                | 47 (22)  |                | 4 (57) |                | 16 (24) |                | 17 (25) |                | 60 (36)  |                | 14 (38) | 0.021  |
| >30-≤70                                    |                | 94 (44)  |                | 2 (29) |                | 30 (45) |                | 25 (37) |                | 71 (43)  |                | 12 (32) |        |
| > 70                                       |                | 75 (35)  |                | 1 (14) |                | 21 (31) |                | 25 (37) |                | 34 (21)  |                | 11 (30) |        |
| <b>Creatinine, mg/dL</b>                   | 0.8 (0.1-6.9)  | 218      | 0.9 (0.6-3.6)  | 6      | 0.9 (0.4-3.2)  | 68      | 0.8 (0.4-7.4)  | 67      | 0.9 (0.4-3)    | 165      | 1.1 (0.3-5.4)  | 46      | <0.001 |
| ≤ 1.3                                      |                | 201 (92) |                | 5 (83) |                | 55 (81) |                | 59 (88) |                | 135 (82) |                | 27 (59) | <0.001 |

|                         |               |          |               |         |                |         |               |         |                |          |                |         |        |
|-------------------------|---------------|----------|---------------|---------|----------------|---------|---------------|---------|----------------|----------|----------------|---------|--------|
| > 1.3                   |               | 17 (8)   |               | 1 (17)  |                | 13 (19) |               | 8 (12)  |                | 30 (18)  |                | 19 (41) |        |
| <b>Urea, mg/dL</b>      | 30 (6-174)    | 208      | 33 (21-64)    | 6       | 41 (18-149)    | 66      | 32 (10-134)   | 67      | 41 (12-156)    | 163      | 60 (23-158)    | 44      | <0.001 |
| ≤ 50                    |               | 185 (89) |               | 5 (83)  |                | 45 (68) |               | 59 (88) |                | 116 (71) |                | 19 (43) | <0.001 |
| > 50                    |               | 23 (11)  |               | 1 (17)  |                | 21 (32) |               | 8 (12)  |                | 47 (29)  |                | 25 (57) |        |
| <b>Uric acid, mg/dL</b> | 4.5 (1-14.6)  | 174      | 3.6 (1.7-7.6) | 5       | 5.2 (2.3-17.1) | 59      | 4.3 (2.3-29)  | 61      | 5.7 (1.3-15.8) | 156      | 6.4 (1.4-15.7) | 34      | <0.001 |
| ≤ 7                     |               | 152 (87) |               | 4 (80)  |                | 45 (76) |               | 55 (90) |                | 121 (78) |                | 21 (62) | 0.003  |
| > 7                     |               | 22 (13)  |               | 1 (20)  |                | 14 (24) |               | 6 (10)  |                | 35 (22)  |                | 13 (38) |        |
| <b>Bilirubin, mg/dL</b> | 0.6 (0.1-6.2) | 212      | 0.7 (0.5-2.2) | 5       | 0.7 (0.3-2.1)  | 64      | 0.6 (0.2-1.8) | 67      | 0.7 (0.1-2.4)  | 164      | 0.8 (0.2-4.8)  | 41      | <0.001 |
| ≤ 1.2                   |               | 179 (84) |               | 3 (60)  |                | 55 (86) |               | 66 (99) |                | 149 (91) |                | 32 (78) | 0.003  |
| > 1.2                   |               | 33 (16)  |               | 2 (40)  |                | 9 (14)  |               | 1 (1)   |                | 15 (9)   |                | 9 (22)  |        |
| <b>AST, U/L</b>         | 23 (6-781)    | 210      | 23 (14-42)    | 6       | 25 (8-88)      | 66      | 21 (10-229)   | 63      | 20 (7-112)     | 159      | 26 (7-1085)    | 45      | 0.036  |
| ≤ 50                    |               | 181 (86) |               | 6 (100) |                | 57 (86) |               | 58 (92) |                | 147 (92) |                | 33 (73) | 0.008  |
| > 50                    |               | 29 (14)  |               | 0       |                | 9 (14)  |               | 5 (8)   |                | 12 (8)   |                | 12 (27) |        |
| <b>ALT, U/L</b>         | 21 (3-714)    | 217      | 16 (8-37)     | 6       | 17 (5-120)     | 67      | 21 (7-306)    | 67      | 15 (3-146)     | 165      | 15 (6-593)     | 44      | <0.001 |
| ≤ 50                    |               | 185 (85) |               | 6 (100) |                | 59 (88) |               | 56 (84) |                | 158 (96) |                | 40 (91) | 0.017  |
| > 50                    |               | 32 (15)  |               | 0       |                | 8 (12)  |               | 11 (16) |                | 7 (4)    |                | 4 (9)   |        |
| <b>AP, U/L</b>          | 72 (26-1158)  | 191      | 77 (52-126)   | 6       | 79 (39-472)    | 60      | 73 (27-542)   | 65      | 73 (30-416)    | 162      | 76 (39-326)    | 29      | 0.6    |
| ≤ 150                   |               | 170 (89) |               | 6 (100) |                | 54 (90) |               | 57 (88) |                | 148 (91) |                | 23 (79) | 0.46   |
| > 150                   |               | 21 (11)  |               | 0       |                | 6 (10)  |               | 8 (12)  |                | 14 (9)   |                | 6 (21)  |        |
| <b>Albumin, g/dL</b>    | 3.7 (1.6-5.1) | 196      | 3.5 (3-4.4)   | 5       | 3.5 (2-4.8)    | 58      | 3.8 (2.4-5.2) | 65      | 3.9 (2.2-5.2)  | 160      | 3.6 (1.7-4.9)  | 34      | <0.001 |

|                         |                 |          |                |         |                 |          |                  |          |                  |          |                 |         |        |
|-------------------------|-----------------|----------|----------------|---------|-----------------|----------|------------------|----------|------------------|----------|-----------------|---------|--------|
| ≤ 3.5                   |                 | 85 (43)  |                | 3 (60)  |                 | 30 (52)  |                  | 21 (32)  |                  | 48 (30)  |                 | 17 (50) | 0.011  |
| > 3.5                   |                 | 111 (57) |                | 2 (40)  |                 | 28 (48)  |                  | 44 (68)  |                  | 112 (70) |                 | 17 (50) |        |
| <b>LDH, U/L</b>         | 618 (138-19670) | 213      | 383 (152-1306) | 6       | 637 (201-11380) | 65       | 309 (101-1496)   | 66       | 426 (143-3845)   | 164      | 941 (149-42630) | 44      | <0.001 |
| ≤ 600                   |                 | 100 (47) |                | 5 (83)  |                 | 33 (51)  |                  | 49 (74)  |                  | 105 (64) |                 | 16 (36) | <0.001 |
| > 600                   |                 | 103 (53) |                | 1 (17)  |                 | 32 (49)  |                  | 17 (26)  |                  | 59 (36)  |                 | 28 (64) |        |
| <b>Fibrinogen</b>       | 467 (34-1150)   | 215      | 485 (287-658)  | 4       | 454 (238-831)   | 64       | 537 (274-944)    | 64       | 504 (145-1002)   | 157      | 517 (93-867)    | 44      | 0.128  |
| ≤ 170                   |                 | 3 (1)    |                | 0       |                 | 0        |                  | 0        |                  | 1 (1)    |                 | 2 (5)   | 0.24   |
| > 170                   |                 | 212 (99) |                | 4 (100) |                 | 64 (100) |                  | 64 (100) |                  | 156 (99) |                 | 42 (95) |        |
| <b>Dimer-D, ng/ml</b>   | 740 (39-128400) | 136      | 394 (394-394)  | 1       | 959 (142-99000) | 34       | 1632 (4-1828000) | 62       | 1271 (11-523300) | 114      | 3358 (22-79630) | 20      | 0.001  |
| ≤ 500                   |                 | 50 (37)  |                | 0       |                 | 7 (21)   |                  | 7 (11)   |                  | 23 (20)  |                 | 3 (15)  | <0.001 |
| > 500                   |                 | 86 (63)  |                | 1 (100) |                 | 27 (79)  |                  | 55 (89)  |                  | 91 (80)  |                 | 17 (85) |        |
| <b>Prothrombin time</b> |                 | 186      |                | 5       |                 | 63       |                  | 62       |                  | 144      |                 | 41      |        |
| Prolonged               |                 | 64 (34)  |                | 0       |                 | 24 (38)  |                  | 19 (31)  |                  | 46 (32)  |                 | 22 (54) | 0.065  |
| Normal                  |                 | 122 (66) |                | 5 (100) |                 | 39 (62)  |                  | 43 (69)  |                  | 98 (68)  |                 | 19 (46) |        |
| <b>APTT</b>             |                 | 211      |                | 6       |                 | 66       |                  | 64       |                  | 150      |                 | 44      |        |
| Prolonged               |                 | 41 (19)  |                | 2 (33)  |                 | 11 (17)  |                  | 2 (3)    |                  | 12 (8)   |                 | 5 (11)  | 0.002  |
| Normal                  |                 | 170 (81) |                | 4 (67)  |                 | 55 (83)  |                  | 62 (97)  |                  | 138 (92) |                 | 39 (89) |        |
| <b>Cytogenetics</b>     |                 | 218      |                | 7       |                 | 68       |                  | 67       |                  | 165      |                 | 46      |        |
| Normal                  |                 | 82 (38)  |                | 4 (57)  |                 | 35 (51)  |                  | 26 (39)  |                  | 60 (36)  |                 | 5 (11)  | <0.001 |
| Abnormal                |                 | 115 (53) |                | 1 (14)  |                 | 28 (41)  |                  | 37 (55)  |                  | 85 (52)  |                 | 26 (57) |        |
| No metaphases           |                 | 18 (8)   |                | 2 (29)  |                 | 4 (6)    |                  | 4 (6)    |                  | 15 (9)   |                 | 4 (9)   |        |

|                             |  |          |  |         |  |         |  |         |  |          |  |         |        |
|-----------------------------|--|----------|--|---------|--|---------|--|---------|--|----------|--|---------|--------|
| Not available               |  | 3 (1)    |  | 0       |  | 1 (1)   |  | 0       |  | 5 (3)    |  | 11 (24) |        |
| <b>MRC Cytogenetic risk</b> |  | 201      |  | 5       |  | 66      |  | 63      |  | 147      |  | 35      |        |
| Favorable                   |  | 23 (11)  |  | 0       |  | 1 (2)   |  | 2 (3)   |  | 1 (1)    |  | 0       | <0.001 |
| Intermediate                |  | 119 (59) |  | 4 (80)  |  | 45 (69) |  | 41 (65) |  | 86 (59)  |  | 12 (34) |        |
| Adverse                     |  | 59 (29)  |  | 1 (20)  |  | 20 (30) |  | 20 (32) |  | 60 (41)  |  | 23 (66) |        |
| <b>FLT3-ITD</b>             |  | 200      |  | 3       |  | 56      |  | 67      |  | 159      |  | 32      |        |
| 0-0.06                      |  | 168 (84) |  | 3 (100) |  | 51 (91) |  | 50 (75) |  | 149 (94) |  | 31 (97) | 0.016  |
| 0.06-0.5                    |  | 9 (5)    |  | 0       |  | 3 (5)   |  | 7 (10)  |  | 4 (3)    |  | 1 (3)   |        |
| 0.5-0.8                     |  | 10 (5)   |  | 0       |  | 1 (2)   |  | 7 (10)  |  | 5 (3)    |  | 0       |        |
| >0.8                        |  | 13 (7)   |  | 0       |  | 1 (2)   |  | 3 (4)   |  | 1 (1)    |  | 0       |        |
| <b>FLT3-TKD</b>             |  | 199      |  | 3       |  | 56      |  | 66      |  | 158      |  | 32      |        |
| Positive                    |  | 11 (6)   |  | 0       |  | 2 (4)   |  | 5 (8)   |  | 5 (3)    |  | 3 (9)   | 0.058  |
| Negative                    |  | 186 (93) |  | 3 (100) |  | 52 (93) |  | 60 (91) |  | 152 (96) |  | 26 (81) |        |
| Not available               |  | 2 (1)    |  | 0       |  | 2 (4)   |  | 1 (2)   |  | 1 (1)    |  | 3 (9)   |        |
| <b>NPM1</b>                 |  | 201      |  | 3       |  | 56      |  | 67      |  | 156      |  | 31      |        |
| Positive                    |  | 66 (33)  |  | 0       |  | 12 (21) |  | 19 (28) |  | 21 (13)  |  | 2 (6)   | <0.001 |
| Negative                    |  | 135 (67) |  | 3 (100) |  | 44 (79) |  | 48 (72) |  | 135 (87) |  | 29 (94) |        |
| <b>CEBPA</b>                |  | 218      |  | 7       |  | 68      |  | 67      |  | 165      |  | 46      |        |
| Positive                    |  | 6 (3)    |  | 0       |  | 2 (3)   |  | 1 (1)   |  | 5 (3)    |  | 0       | <0.001 |
| Negative                    |  | 98 (45)  |  | 1 (14)  |  | 27 (40) |  | 51 (76) |  | 122 (74) |  | 18 (39) |        |
| Not available               |  | 114 (52) |  | 6 (86)  |  | 39 (57) |  | 15 (23) |  | 38 (23)  |  | 28 (61) |        |
| <b>IDH</b>                  |  | 218      |  | 7       |  | 68      |  | 67      |  | 165      |  | 46      |        |
| IDH1 positive               |  | 5 (2)    |  | 0       |  | 1 (1)   |  | 7 (10)  |  | 9 (5)    |  | 1 (2)   | <0.001 |
| IDH2 positive               |  | 19 (9)   |  | 0       |  | 4 (6)   |  | 9 (13)  |  | 20 (12)  |  | 2 (4)   |        |
| Negative                    |  | 111 (51) |  | 1 (14)  |  | 20 (29) |  | 39 (58) |  | 83 (50)  |  | 12 (26) |        |
| Not available               |  | 83 (38)  |  | 6 (86)  |  | 43 (63) |  | 12 (18) |  | 53 (32)  |  | 31 (67) |        |

|                                     |  |          |  |        |  |         |  |         |  |          |  |         |        |
|-------------------------------------|--|----------|--|--------|--|---------|--|---------|--|----------|--|---------|--------|
| <b>KIT</b>                          |  | 218      |  | 7      |  | 68      |  | 64      |  | 164      |  | 46      |        |
| Positive                            |  | 6 (3)    |  | 0      |  | 0       |  | 0       |  | 1 (1)    |  | 0       | <0.001 |
| Negative                            |  | 38 (17)  |  | 1 (14) |  | 8 (12)  |  | 47 (73) |  | 60 (37)  |  | 3 (7)   |        |
| Not available                       |  | 174 (80) |  | 6 (86) |  | 60 (88) |  | 17 (27) |  | 103 (63) |  | 43 (93) |        |
| <b>Relevant Cardiac comorbidity</b> |  | 218      |  | 7      |  | 68      |  | 67      |  | 165      |  | 46      |        |
| Yes                                 |  | 19 (9)   |  | 2 (29) |  | 11 (16) |  | 9 (13)  |  | 32 (19)  |  | 9 (20)  | 0.043  |
| No                                  |  | 199 (91) |  | 5 (71) |  | 57 (84) |  | 58 (87) |  | 133 (81) |  | 37 (80) |        |
| <b>Previous anthracycline</b>       |  | 218      |  | 7      |  | 68      |  | 67      |  | 165      |  | 46      |        |
| Yes                                 |  | 5 (2)    |  | 1 (14) |  | 6 (9)   |  | 4 (6)   |  | 4 (2)    |  | 7 (15)  | 0.001  |
| No                                  |  | 213 (98) |  | 6 (86) |  | 62 (91) |  | 63 (94) |  | 161 (98) |  | 39 (85) |        |

**Supplementary Table S3. Overall cohort: Multivariate analyses of prognostic factors for development of fatal cardiac events**

| Covariate                    | Unfavorable category | Univariate Analysis | Multivariate Analysis | P value |
|------------------------------|----------------------|---------------------|-----------------------|---------|
|                              |                      | P value             | HR (95% CI)           |         |
| Age                          | ≥65                  | 0.247               | 1.1 (0.3-4.7)         | 0.88    |
| ECOG                         | >2                   | 0.56                | 1.3 (0.4-4)           | 0.66    |
| Relevant cardiac antecedents | Yes                  | <0.001              | 1.9 (2.8-16.6)        | <0.001  |
| Front-line therapy           | Intensive            | 0.37                | 2 (0.4-9.4)           | 0.4     |
| Front-line clinical trial    | Yes                  | 0.062               | 2.4 (0.1-1.2)         | 0.095   |
| Use of FLT3 inhibitors       | Yes                  | 0.757               | 2.3 (0.1-2.9)         | 0.38    |

Abbreviations: HR: hazard ratio; CI: confidence interval

**Supplementary Table S4. Overall cohort: Multivariate analyses of prognostic factors for development of non-fatal cardiac events**

| Covariate                    | Unfavorable category | Univariate Analysis | Multivariate Analysis | P value |
|------------------------------|----------------------|---------------------|-----------------------|---------|
|                              |                      | P value             | HR (95% CI)           |         |
| Age                          | ≥65                  | <0.001              | 2.2 (1.5-3.3)         | <0.001  |
| ECOG                         | >2                   | 0.626               | 1.1 (0.8-1.5)         | 0.54    |
| Relevant cardiac antecedents | Yes                  | 0.004               | 1.4 (1.1-2)           | 0.023   |
| Front-line therapy           | Non-intensive        | 0.17                | 1.8 (1.2-2.8)         | 0.004   |
| Front-line clinical trial    | Yes                  | <0.001              | 1.2 (0.6-1.1)         | 0.21    |
| Use of FLT3 inhibitors       | Yes                  | 0.28                | 1.0 (0.6-1.7)         | 0.89    |

Abbreviations: HR: hazard ratio; CI: confidence interval

**Supplementary Table S5. 1L study cohort (from index date to last follow-up): First line Intensive chemotherapy patients only. Crude incidence of first cardiac events (Grade 1-2 vs grade 3-4 vs grade 5 vs no cardiac event) according to time of occurrence (before starting therapy, during induction cycle, consolidation, after stem cell transplant, off therapy/follow-up)**

| Characteristic                 | N   | No cardiac event | Grade 1-2 | Grade 3-4 | Grade 5 |
|--------------------------------|-----|------------------|-----------|-----------|---------|
|                                |     | n (%)            | n (%)     | n (%)     | n (%)   |
| <b>N</b>                       | 285 | 165 (57.9)       | 40 (14)   | 76 (26.7) | 4 (1.4) |
| <b>Before starting therapy</b> | 285 | 276 (96.8)       | 1 (0.4)   | 8 (2.8)   | 0 (0)   |
| <b>Induction</b>               | 285 | 222 (77.9)       | 20 (7)    | 42 (14.7) | 1 (0.4) |
| <b>Consolidation</b>           | 169 | 142 (84)         | 11 (6.5)  | 14 (8.3)  | 2 (1.2) |
| <b>Allogeneic HSCT</b>         | 65  | 58 (89.2)        | 3 (4.6)   | 4 (6.2)   | 0 (0)   |
| <b>Off therapy/ follow-up</b>  | 163 | 149 (91.4)       | 5 (3.1)   | 8 (4.9)   | 1 (0.6) |

**Supplementary Table S6. Intensive chemotherapy patients only: Crude and cumulative incidence of cardiac events (Fatal vs non-fatal vs no cardiac event) according to demographic, clinical, and biological characteristics of intensive chemotherapy patients at diagnosis.**

|                                         | No cardiac event | P value* | Fatal                    |                      |               |         | Non-fatal                |                      |               |         |
|-----------------------------------------|------------------|----------|--------------------------|----------------------|---------------|---------|--------------------------|----------------------|---------------|---------|
| Characteristic                          | N (%)            |          | Crude incidence<br>N (%) | Cumulative incidence |               |         | Crude incidence<br>N (%) | Cumulative incidence |               |         |
|                                         |                  |          |                          | At 6 months, %       | At Last FU, % | P value |                          | At 6 months, %       | At Last FU, % | P value |
| <b>N</b>                                | 125 (43.9)       |          | 10 (3.5)                 | 1.9                  | 6.3           |         | 150 (52.6)               | 42.5                 | 54.7          |         |
| <b>Age</b>                              | 125              |          | 10                       |                      |               |         | 150                      |                      |               |         |
| <65 years                               | 117 (46.8)       | 0.022    | 9 (3.6)                  | 1.7                  | 6.2           | 0.79    | 124 (49.6)               | 38.7                 | 51.5          | <0.001  |
| ≥65 years                               | 8 (22.9)         |          | 1 (2.9)                  | 3.6                  | 3.6           |         | 26 (74.3)                | 69.4                 | 75.6          |         |
| <b>Relevant cardiologic antecedents</b> | 125              |          | 10                       |                      |               |         | 150                      |                      |               |         |
| No                                      | 120 (46.7)       | <0.001   | 6 (2.3)                  | 1.3                  | 5             | <0.001  | 131 (51)                 | 40.3                 | 52.4          | 0.02    |
| Yes                                     | 5 (17.9)         |          | 4 (14.3)                 | 7.4                  | 18.5          |         | 19 (67.9)                | 64.4                 | 74.4          |         |
| <b>Previous anthracycline treatment</b> | 125              |          | 10                       |                      |               |         | 150                      |                      |               |         |
| No                                      | 120 (44.8)       | 0.11     | 8 (3)                    | 1.2                  | 5.8           | 0.008   | 140 (52.2)               | 42.1                 | 54.1          | 0.27    |
| Yes                                     | 5 (29.4)         |          | 2 (11.8)                 | 13.4                 | 13.4          |         | 10 (58.8)                | 50.4                 | 57.8          |         |
| <b>ECOG at diagnosis</b>                | 125              |          | 10                       |                      |               |         | 150                      |                      |               |         |
| <2                                      | 109 (43.8)       | 0.76     | 8 (3.2)                  | 1.7                  | 6.1           | 0.34    | 132 (53)                 | 42.9                 | 55.1          | 0.79    |
| ≥2                                      | 16 (44.4)        |          | 2 (5.6)                  | 2.8                  | 6.8           |         | 18 (50)                  | 39.8                 | 52.6          |         |
| <b>FLT3-ITD status</b>                  | 117              |          | 10                       |                      |               |         | 140                      |                      |               |         |

|                                    |            |      |         |     |     |      |            |      |      |       |
|------------------------------------|------------|------|---------|-----|-----|------|------------|------|------|-------|
| <b>Negative</b>                    | 91 (42.5)  | 0.56 | 9 (4.2) | 2.5 | 7.5 | 0.46 | 114 (53.3) | 43.6 | 55.8 | 0.66  |
| <b>Positive</b>                    | 26 (49.1)  |      | 1 (1.9) | 0   | 2.3 |      | 26 (49.1)  | 39.6 | 49.3 |       |
| <b>Inclusion in clinical trial</b> | 125        |      | 10      |     |     |      | 150        |      |      |       |
| <b>No</b>                          | 103 (47.3) | 0.11 | 7 (3.2) | 1.5 | 5.8 | 0.36 | 108 (49.5) | 37.9 | 51.1 | 0.011 |
| <b>Yes</b>                         | 22 (32.8)  |      | 3 (4.5) | 3.2 | 5.2 |      | 42 (62.7)  | 57.7 | 64.2 |       |
| <b>Use of FLT3 inhibitors</b>      | 125        |      | 10      |     |     |      | 150        |      |      |       |
| <b>No</b>                          | 111 (44.8) | 0.67 | 9 (3.6) | 2.2 | 3.9 | 0.89 | 128 (51.6) | 40.8 | 53.4 | 0.20  |
| <b>Yes</b>                         | 14 (37.8)  |      | 1 (2.7) | 0   | 3.1 |      | 22 (59.5)  | 54.1 | 59.7 |       |

\*This P value compares the crude incidence between the 3 groups

**Supplementary Table S7. Non-intensive chemotherapy patients only: Crude and cumulative incidence of cardiac events (Fatal vs non-fatal vs no cardiac event) according to demographic, clinical, and biological characteristics of intensive chemotherapy patients at diagnosis.**

| Characteristic      | No cardiac event | P value* | Fatal                    |                      |               |         | Non-fatal                |                      |               |         |
|---------------------|------------------|----------|--------------------------|----------------------|---------------|---------|--------------------------|----------------------|---------------|---------|
|                     |                  |          | Crude Incidence<br>N (%) | Cumulative incidence |               |         | Crude Incidence<br>N (%) | Cumulative incidence |               |         |
|                     |                  |          |                          | At 6 months, %       | At Last FU, % | P value |                          | At 6 months, %       | At Last FU, % | P value |
| <b>N</b>            | 93 (38.8)        |          | 9 (3.8)                  | 2.2                  | 6.8           |         | 138 (57.5)               | 45.2                 | 59.6          |         |
| <b>Age</b>          | 93               |          | 9                        |                      |               |         | 138                      |                      |               |         |
| <b>&lt;65 years</b> | 11 (78.6)        | 0.007    | 0                        | 0                    | 0             | 0.54    | 3 (21.4)                 | 21.4                 | 21.4          | 0.059   |
| <b>≥65 years</b>    | 82 (36.3)        |          | 9 (4)                    | 2.4                  | 7.2           |         | 135 (59.7)               | 46.6                 | 62            |         |

|                                                 |           |       |          |     |      |       |            |      |      |       |
|-------------------------------------------------|-----------|-------|----------|-----|------|-------|------------|------|------|-------|
| <b>Relevant<br/>cardiologic<br/>antecedents</b> | 93        |       | 9        |     |      |       | 138        |      |      |       |
| <b>No</b>                                       | 82 (42.1) | 0.003 | 4 (2.1)  | 1.1 | 3.7  | 0.002 | 109 (55.9) | 43.8 | 57.3 | 0.1   |
| <b>Yes</b>                                      | 11 (24.4) |       | 5 (11.1) | 7.1 | 22.1 |       | 29 (64.4)  | 51.4 | 70.6 |       |
| <b>Previous<br/>anthracycline<br/>treatment</b> | 93        |       | 9        |     |      |       | 138        |      |      |       |
| <b>No</b>                                       | 87 (38.8) | 0.7   | 9 (4)    | 2.4 | 7.2  | 0.42  | 128 (57.1) | 44.8 | 59.1 | 0.94  |
| <b>Yes</b>                                      | 6 (37.5)  |       | 0        | 0   | 0    |       | 10 (62.5)  | 50   | 56.3 |       |
| <b>ECOG</b>                                     | 93        |       | 9        |     |      |       | 138        |      |      |       |
| <b>&lt;2</b>                                    | 64 (37.9) | 0.83  | 7 (4.1)  | 2.4 | 7.4  | 0.84  | 98 (58)    | 43.9 | 60.3 | 0.66  |
| <b>≥2</b>                                       | 29 (40.9) |       | 2 (2.8)  | 1.5 | 4.8  |       | 40 (56.3)  | 48.3 | 57.6 |       |
| <b>FLT3-ITD status</b>                          | 80        |       | 9        |     |      |       | 129        |      |      |       |
| <b>Negative</b>                                 | 70 (36.1) | 0.86  | 8 (4.1)  | 2.2 | 7.5  | 0.82  | 116 (59.8) | 44.9 | 62.1 | 0.94  |
| <b>Positive</b>                                 | 10 (41.7) |       | 1 (4.2)  | 4.8 | 4.8  |       | 13 (54.2)  | 51.3 | 55.8 |       |
| <b>Inclusion in<br/>clinical trial</b>          | 93        |       | 9        |     |      |       | 138        |      |      |       |
| <b>No</b>                                       | 37 (49.3) | 0.047 | 1 (1.3)  | 0   | 8    | 0.24  | 37 (49.3)  | 36   | 48   | 0.071 |
| <b>Yes</b>                                      | 56 (33.9) |       | 8 (4.9)  | 3.2 | 7.1  |       | 101 (61.2) | 49.4 | 63.9 |       |
| <b>Use of FLT3<br/>inhibitors</b>               | 93        |       | 9        |     |      |       | 138        |      |      |       |
| <b>No</b>                                       | 93 (38.9) | 0.69  | 9 (3.8)  | 2.2 | 6.8  | 0.86  | 137 (57.3) | 44.9 | 59.5 | NA    |
| <b>Yes</b>                                      | 0         |       | 0        | 0   | 0    |       | 1 (100)    | NA   | NA   |       |

\*This P value compares the crude incidence between the 3 groups

**Supplementary Table S8. Overall study cohort: Crude and cumulative incidence of QTcF prolongation events (grade 0 vs grade 1-2 vs grade 3-4 vs grade 5) according to demographic, clinical, and biological characteristics of patients at diagnosis.**

|                                         | No QTcF prolongation | P value* | Grade 1-2 QTcF prolongation |                      |               |         | Grade 3-4 QTcF prolongation** |                      |               |         |
|-----------------------------------------|----------------------|----------|-----------------------------|----------------------|---------------|---------|-------------------------------|----------------------|---------------|---------|
| Characteristic                          | N (%)                |          | Crude incidence<br>N (%)    | Cumulative incidence |               |         | Crude incidence<br>N (%)      | Cumulative incidence |               |         |
|                                         |                      |          |                             | At 6 months, %       | At Last FU, % | P value |                               | At 6 months, %       | At Last FU, % | P value |
| <b>N</b>                                | 452 (86)             |          | 59 (11.2)                   | 8.4                  | 11.6          |         | 14 (2.7)                      | 1.5                  | 3.1           |         |
| <b>Age</b>                              | 452                  |          | 59                          |                      |               |         | 14                            |                      |               |         |
| <65 years                               | 234 (88.6)           | 0.01     | 20 (7.6)                    | 6.1                  | 7.6           | 0.007   | 10 (3.8)                      | 1.5                  | 4.3           | 0.16    |
| ≥65 years                               | 218 (83.5)           |          | 39 (14.9)                   | 10.8                 | 16            |         | 4 (1.5)                       | 1.5                  | 1.5           |         |
| <b>Relevant cardiologic antecedents</b> | 452                  |          | 59                          |                      |               |         | 14                            |                      |               |         |
| No                                      | 397 (87.8)           | 0.015    | 44 (9.7)                    | 7.3                  | 10.2          | 0.008   | 11 (2.4)                      | 1.8                  | 2.5           | 0.38    |
| Yes                                     | 55 (75.3)            |          | 15 (20.6)                   | 15.1                 | 20.9          |         | 3 (4.1)                       | 0                    | 6             |         |
| <b>Previous anthracycline treatment</b> | 452                  |          | 59                          |                      |               |         | 14                            |                      |               |         |
| No                                      | 425 (86.4)           | 0.75     | 54 (11)                     | 8.1                  | 11.2          | 0.49    | 13 (2.6)                      | 1.4                  | 3.1           | 0.87    |
| Yes                                     | 27 (81.8)            |          | 5 (15.2)                    | 12.1                 | 12.1          |         | 1 (3)                         | 3.3                  | 3.3           |         |
| <b>ECOG at diagnosis</b>                | 452                  |          | 59                          |                      |               |         | 14                            |                      |               |         |
| <2                                      | 356 (85.2)           | 0.48     | 50 (12)                     | 8.9                  | 12.4          | 0.29    | 12 (2.9)                      | 1.4                  | 3.4           | 0.56    |
| ≥2                                      | 96 (89.7)            |          | 9 (8.4)                     | 6.6                  | 8.6           |         | 2 (1.9)                       | 1.9                  | 1.9           |         |
| <b>FLT3-ITD status</b>                  | 416                  |          | 57                          |                      |               |         | 12                            |                      |               |         |
| Negative                                | 347 (85.1)           | 0.5      | 51 (12.5)                   | 9.1                  | 13            | 0.26    | 10 (2.5)                      | 1.2                  | 3             | 0.96    |
| Positive                                | 69 (89.6)            |          | 6 (7.8)                     | 6.5                  | 7.9           |         | 2 (2.6)                       | 1.3                  | 2.7           |         |

|                                    |            |        |           |      |      |        |          |     |     |      |
|------------------------------------|------------|--------|-----------|------|------|--------|----------|-----|-----|------|
| <b>Treatment chemotherapy</b>      | 452        |        | 59        |      |      |        | 14       |     |     |      |
| <b>Intensive</b>                   | 245 (86)   | 0.38   | 30 (10.5) | 8.4  | 10.6 | 0.59   | 10 (3.5) | 1.4 | 4.1 | 0.24 |
| <b>Non-intensive</b>               | 207 (86.3) |        | 29 (12.1) | 8.4  | 12.9 |        | 4 (1.7)  | 1.7 | 1.7 |      |
| <b>Inclusion in clinical trial</b> | 452        |        | 59        |      |      |        | 14       |     |     |      |
| <b>No</b>                          | 268 (91.5) | <0.001 | 17 (5.8)  | 4.4  | 5.8  | <0.001 | 8 (2.7)  | 1   | 2.6 | 0.87 |
| <b>Yes</b>                         | 184 (79.3) |        | 42 (18.1) | 13.4 | 20.5 |        | 6 (2.6)  | 2.2 | 3.1 |      |
| <b>Use of FLT3 inhibitors</b>      | 452        |        | 59        |      |      |        | 14       |     |     |      |
| <b>No</b>                          | 424 (87.1) | 0.041  | 50 (10.3) | 7.6  | 10.6 | 0.008  | 13 (2.7) | 1.4 | 2.6 | 0.95 |
| <b>Yes</b>                         | 28 (73.7)  |        | 9 (23.7)  | 18.4 | 24.4 |        | 1 (2.6)  | 2.6 | 2.6 |      |

\*This P value compares the crude incidence between the 3 groups; \*\* All were grade 3

**Supplementary Table S9. Overall cohort: Crude and cumulative incidence of arrhythmia (grade 0 vs grade 1-2 vs grade 3-4 vs grade 5) according to demographic, clinical, and biological characteristics of patients at diagnosis.**

|                     | No arrhythmia | P value* | Grade 1-2 arrhythmia     |                      |              |         | Grade 3-4 arrhythmia     |                      |              |       | Grade 5 arrhythmia       |                      |              |         |
|---------------------|---------------|----------|--------------------------|----------------------|--------------|---------|--------------------------|----------------------|--------------|-------|--------------------------|----------------------|--------------|---------|
| Characteristic      | N (%)         |          | Crude incidence<br>N (%) | Cumulative incidence |              |         | Crude incidence<br>N (%) | Cumulative incidence |              |       | Crude incidence<br>N (%) | Cumulative incidence |              |         |
|                     |               |          |                          | At 6 months, %       | At Last FU,% | P value |                          | At 6 months, %       | At Last FU,% | P     |                          | At 6 months, %       | At Last FU,% | P value |
| <b>N</b>            | 461 (89)      |          | 10 (1.9)                 | 1.2                  | 2.3          |         | 48 (9.1)                 | 7.3                  | 9.2          |       | 6                        | 0.4                  | 1            |         |
| <b>Age</b>          | 461           |          | 10                       |                      |              |         | 48                       |                      |              |       | 6                        |                      |              |         |
| <b>&lt;65 years</b> | 242 (91.7)    | 0.045    | 3 (1.1)                  | 0.4                  | 1.7          | 0.15    | 16 (6.1)                 | 4.9                  | 6.1          | 0.013 | 3 (1.1)                  | 0.8                  | 2.3          | 0.61    |
| <b>≥65 years</b>    | 219 (83.9)    |          | 7 (2.7)                  | 2                    | 2.9          |         | 32 (12.3)                | 9.6                  | 12.4         |       | 3 (1.1)                  | 0.8                  | 1.2          |         |

|                                                 |            |       |          |     |     |       |           |      |      |       |         |     |     |      |
|-------------------------------------------------|------------|-------|----------|-----|-----|-------|-----------|------|------|-------|---------|-----|-----|------|
| <b>Relevant<br/>cardiologic<br/>antecedents</b> | 461        |       | 10       |     |     |       | 48        |      |      |       |         |     |     |      |
| <b>No</b>                                       | 402 (88.9) | 0.12  | 9 (2)    | 1.3 | 2.1 | 0.69  | 37 (8.2)  | 6.2  | 8.2  | 0.055 | 4 (0.9) | 0.5 | 1.8 | 0.14 |
| <b>Yes</b>                                      | 59 (80.8)  |       | 1 (1.4)  | 0   | 1.9 |       | 11 (15.1) | 13.7 | 15.1 |       | 2 (2.7) | 2.8 | 2.8 |      |
| <b>Previous<br/>anthracycline<br/>treatment</b> | 461        |       | 10       |     |     |       | 48        |      |      |       |         |     |     |      |
| <b>No</b>                                       | 433 (88)   | 0.71  | 9 (1.8)  | 1.2 | 2.2 | 0.63  | 45 (9.2)  | 7.1  | 9.2  | 0.96  | 5 (1)   | 0.6 | 1.8 | 0.21 |
| <b>Yes</b>                                      | 28 (84.8)  |       | 1 (3)    | 0   | 3.4 |       | 3 (9.1)   | 9.1  | 9.1  |       | 1 (3)   | 3.0 | 3.0 |      |
| <b>ECOG at diagnosis</b>                        | 461        |       | 10       |     |     |       | 48        |      |      |       |         |     |     |      |
| <b>&lt;2</b>                                    | 375 (89.7) | 0.043 | 7 (1.7)  | 1.2 | 2.1 | 0.39  | 31 (7.4)  | 5.3  | 7.5  | 0.005 | 5 (1.2) | 0.7 | 2.1 | 0.93 |
| <b>≥2</b>                                       | 86 (80.4)  |       | 3 (2.8)  | 1   | 3.4 |       | 17 (15.9) | 15   | 16   |       | 1 (0.9) | 1   | 1   |      |
| <b>FLT3-ITD status</b>                          | 425        |       | 8        |     |     |       | 46        |      |      |       |         |     |     |      |
| <b>Negative</b>                                 | 358 (87.7) | 0.63  | 6 (1.5)  | 1.3 | 1.9 | 0.47  | 38 (9.3)  | 7.4  | 9.3  | 0.77  | 6 (1.5) | 1.0 | 2.4 | 0.3  |
| <b>Positive</b>                                 | 67 (87)    |       | 2 (2.6)  | 1   | 2.8 |       | 8 (10.4)  | 7.8  | 10.6 |       | 0       | 0   | 0   |      |
| <b>Treatment<br/>chemotherapy</b>               | 461        |       | 10       |     |     |       | 48        |      |      |       |         |     |     |      |
| <b>Intensive</b>                                | 259 (90.9) | 0.10  | 3 (1.1)  | 0.4 | 1.6 | 0.1   | 20 (7)    | 5.6  | 7    | 0.062 | 3 (1)   | 0.7 | 2.3 | 0.49 |
| <b>Non-intensive</b>                            | 202 (84.2) |       | 7 (2.9)  | 2.1 | 3.1 |       | 28 (11.7) | 9.2  | 11.8 |       | 3 (1.2) | 0.9 | 1.3 |      |
| <b>Inclusion in clinical<br/>trial</b>          | 461        |       | 10       |     |     |       | 48        |      |      |       |         |     |     |      |
| <b>No</b>                                       | 261 (89.1) | 0.40  | 3 (1)    | 0.3 | 1.4 | 0.067 | 26 (8.9)  | 7.9  | 8.9  | 0.82  | 3 (1)   | 0.7 | 1.9 | 0.54 |
| <b>Yes</b>                                      | 200 (86.2) |       | 7 (3)    | 2.2 | 3.2 |       | 22 (9.5)  | 6.5  | 9.6  |       | 3 (1.3) | 0.9 | 1.3 |      |
| <b>Use of FLT3<br/>inhibitors</b>               | 461        |       | 10       |     |     |       | 48        |      |      |       |         |     |     |      |
| <b>No</b>                                       | 425 (87.3) | 0.54  | 10 (2.1) | 1.3 | 1.9 | 0.39  | 46 (9.5)  | 7.6  | 9.5  | 0.38  | 6 (1.2) | 0.8 | 1.9 | 0.52 |

|     |           |  |   |   |   |  |         |     |     |  |   |   |   |  |
|-----|-----------|--|---|---|---|--|---------|-----|-----|--|---|---|---|--|
| Yes | 36 (94.7) |  | 0 | 0 | 0 |  | 2 (5.3) | 2.6 | 5.3 |  | 0 | 0 | 0 |  |
|-----|-----------|--|---|---|---|--|---------|-----|-----|--|---|---|---|--|

\*This P value compares the crude incidence between the 4 groups

**Supplementary Table S10. Overall study cohort: Crude and cumulative incidence of heart failure and related events (grade 0 vs grade 1-2 vs grade 3-4 vs grade 5) according to demographic, clinical, and biological characteristics of patients at diagnosis.**

|                                         | No cardiac failure event | P value* | Grade 1-2 cardiac failure event |                      |               |         | Grade 3-4 cardiac failure event |                      |               |         | Grade 5 cardiac failure event |                      |               |         |
|-----------------------------------------|--------------------------|----------|---------------------------------|----------------------|---------------|---------|---------------------------------|----------------------|---------------|---------|-------------------------------|----------------------|---------------|---------|
| Characteristic                          | N (%)                    |          | Crude incidence<br>N (%)        | Cumulative incidence |               |         | Crude incidence<br>N (%)        | Cumulative incidence |               |         | Crude incidence<br>N (%)      | Cumulative incidence |               |         |
|                                         |                          |          |                                 | At 6 months, %       | At Last FU, % | P value |                                 | At 6 months, %       | At Last FU, % | P value |                               | At 6 months, %       | At Last FU, % | P value |
| <b>N</b>                                | 428 (81.5)               |          | 7 (1.3)                         | 1                    | 1.4           |         | 79 (15)                         | 12.2                 | 15.3          |         | 11 (2.1)                      | 1                    | 2.4           |         |
| <b>Age</b>                              | 428                      |          | 7                               |                      |               |         | 79                              |                      |               |         | 11                            |                      |               |         |
| <65 years                               | 217 (82.2)               | 0.23     | 6 (2.3)                         | 1.5                  | 2.4           | 0.071   | 36 (13.6)                       | 11                   | 13.9          | 0.32    | 5 (1.9)                       | 0.4                  | 2.2           | 0.58    |
| ≥65 years                               | 211 (80.8)               |          | 1 (0.4)                         | 0.4                  | 0.4           |         | 43 (16.5)                       | 13.5                 | 16.7          |         | 6 (2.3)                       | 1.6                  | 2.8           |         |
| <b>Relevant cardiologic antecedents</b> | 428                      |          | 7                               |                      |               |         | 79                              |                      |               |         | 11                            |                      |               |         |
| No                                      | 376 (83.2)               | 0.008    | 6 (1.3)                         | 0.9                  | 1.4           | 0.93    | 64 (14.2)                       | 11.3                 | 14.4          | 0.13    | 6 (1.3)                       | 0.7                  | 1.6           | 0.001   |
| Yes                                     | 52 (71.2)                |          | 1 (1.4)                         | 1.4                  | 1.4           |         | 15 (20.6)                       | 18.1                 | 21            |         | 5 (6.9)                       | 2.8                  | 8             |         |
| <b>Previous anthracycline treatment</b> | 428                      |          | 7                               |                      |               |         | 79                              |                      |               |         | 11                            |                      |               |         |
| No                                      | 403 (81.9)               | 0.65     | 7 (1.4)                         | 1                    | 1.5           | 0.5     | 72 (14.6)                       | 12                   | 14.9          | 0.34    | 10 (2)                        | 0.8                  | 2.4           | 0.57    |
| Yes                                     | 25 (75.8)                |          | 0                               | 0                    | 0             |         | 7 (21.2)                        | 15.4                 | 21.7          |         | 1 (3)                         | 3.1                  | 3.1           |         |
| <b>ECOG at diagnosis</b>                | 428                      |          | 7                               |                      |               |         | 79                              |                      |               |         | 11                            |                      |               |         |

|                                    |            |      |         |     |     |      |           |      |      |       |          |     |     |      |
|------------------------------------|------------|------|---------|-----|-----|------|-----------|------|------|-------|----------|-----|-----|------|
| <2                                 | 349 (83.5) | 0.06 | 6 (1.4) | 1   | 1.5 | 0.76 | 54 (12.9) | 10.1 | 13.2 | 0.005 | 9 (2.2)  | 1.2 | 2.5 | 0.99 |
| ≥2                                 | 79 (73.8)  |      | 1 (0.9) | 0.9 | 0.9 |      | 25 (23.4) | 20.6 | 23.6 |       | 2 (1.9)  | 0   | 2.7 |      |
| <b>FLT3-ITD status</b>             | 395        |      | 7       |     |     |      | 72        |      |      |       | 11       |     |     |      |
| <b>Negative</b>                    | 334 (81.9) | 0.81 | 5 (1.2) | 1   | 1.3 | 0.36 | 60 (14.7) | 11.8 | 14.9 | 0.79  | 9 (2.2)  | 1   | 2.6 | 0.79 |
| <b>Positive</b>                    | 61 (79.2)  |      | 2 (2.6) | 1.3 | 2.8 |      | 12 (15.6) | 13   | 15.7 |       | 2 (2.6)  | 1.3 | 2.8 |      |
| <b>Treatment chemotherapy</b>      | 428        |      | 7       |     |     |      | 79        |      |      |       | 11       |     |     |      |
| <b>Intensive</b>                   | 230 (80.7) | 0.42 | 6 (2.1) | 1.4 | 2.2 | 0.1  | 43 (15.1) | 12.3 | 15.4 | 0.99  | 6 (2.1)  | 0.7 | 2.5 | 0.93 |
| <b>Non-intensive</b>               | 198 (82.5) |      | 1 (0.4) | 0.4 | 0.4 |      | 36 (15)   | 12.2 | 15.2 |       | 5 (2.1)  | 1.3 | 2.4 |      |
| <b>Inclusion in clinical trial</b> | 428        |      | 7       |     |     |      | 79        |      |      |       | 11       |     |     |      |
| <b>No</b>                          | 238 (81.2) | 0.23 | 6 (2.1) | 1.4 | 2.1 | 0.12 | 45 (15.4) | 12.3 | 15.5 | 0.93  | 4 (1.4)  | 0   | 1.7 | 0.12 |
| <b>Yes</b>                         | 190 (81.9) |      | 1 (0.4) | 0.5 | 0.5 |      | 34 (14.7) | 12.2 | 14.9 |       | 7 (3)    | 2.2 | 3.2 |      |
| <b>Use of FLT3 inhibitors</b>      | 428        |      | 7       |     |     |      | 79        |      |      |       | 11       |     |     |      |
| <b>No</b>                          | 398 (81.7) | 0.18 | 5 (1)   | 0.8 | 1.1 | 0.15 | 74 (15.2) | 12.4 | 15.4 | 0.81  | 10 (2.1) | 1.1 | 2.4 | 0.74 |
| <b>Yes</b>                         | 30 (79)    |      | 2 (5.3) | 2.6 | 5.6 |      | 5 (13.2)  | 10.5 | 13.3 |       | 1 (2.6)  | 0   | 3   |      |

\*This P value compares the crude incidence between the 4 groups

**Supplementary Table S11. Overall study cohort: Crude and cumulative incidence of cardioischemic events (grade 0 vs grade 1-2 vs grade 3-4 vs grade 5\*) according to demographic, clinical, and biological characteristics of patients at diagnosis.**

|  | No cardioischemic event | P value* | Grade 1-2 cardioischemic event | Grade 3-4 cardioischemic event |
|--|-------------------------|----------|--------------------------------|--------------------------------|
|--|-------------------------|----------|--------------------------------|--------------------------------|

| Characteristic                          | N (%)      |      | Crude incidence<br>N (%) | Cumulative incidence |              |         | Crude incidence<br>N (%) | Cumulative incidence |              |         |
|-----------------------------------------|------------|------|--------------------------|----------------------|--------------|---------|--------------------------|----------------------|--------------|---------|
|                                         |            |      |                          | At 6 months, %       | At Last FU,% | P value |                          | At 6 months, %       | At Last FU,% | P value |
| <b>N</b>                                | 505 (96.2) |      | 11 (2.1)                 | 1.5                  | 2.1          |         | 9 (1.7)                  | 1.9                  | 4.1          |         |
| <b>Age</b>                              | 505        |      | 11                       |                      |              |         | 9                        |                      |              |         |
| <65 years                               | 255 (96.6) | 0.62 | 4 (1.5)                  | 1.1                  | 1.6          | 0.35    | 5 (1.9)                  | 1.5                  | 3.8          | 0.52    |
| ≥65 years                               | 250 (95.8) |      | 7 (2.7)                  | 1.9                  | 2.7          |         | 4 (1.5)                  | 2.3                  | 4.3          |         |
| <b>Relevant cardiologic antecedents</b> | 505        |      | 11                       |                      |              |         | 9                        |                      |              |         |
| No                                      | 436 (96.5) | 0.7  | 9 (2)                    | 1.3                  | 2            | 0.69    | 7 (1.6)                  | 1.5                  | 3.9          | 0.48    |
| Yes                                     | 69 (94.5)  |      | 2 (2.7)                  | 2.7                  | 2.7          |         | 2 (2.7)                  | 4.1                  | 5.5          |         |
| <b>Previous anthracycline treatment</b> | 505        |      | 11                       |                      |              |         | 9                        |                      |              |         |
| No                                      | 474 (96.3) | 0.77 | 10 (2)                   | 1.4                  | 2.1          | 0.69    | 8 (1.6)                  | 1.8                  | 4            | 0.48    |
| Yes                                     | 31 (93.9)  |      | 1 (3)                    | 3.1                  | 3.1          |         | 1 (3)                    | 3                    | 6.1          |         |
| <b>ECOG at diagnosis</b>                | 505        |      | 11                       |                      |              |         | 9                        |                      |              |         |
| <2                                      | 400 (95.7) | 0.5  | 10 (2.4)                 | 1.9                  | 2.4          | 0.34    | 8 (1.9)                  | 2.2                  | 4.7          | 0.21    |
| ≥2                                      | 105 (98.1) |      | 1 (0.9)                  | 0                    | 1            |         | 1 (0.9)                  | 0.9                  | 1.9          |         |
| <b>FLT3-ITD status</b>                  | 468        |      | 10                       |                      |              |         | 7                        |                      |              |         |
| Negative                                | 392 (96.1) | 0.38 | 10 (2.5)                 | 2                    | 2.5          | 0.17    | 6 (1.5)                  | 2                    | 4.2          | 0.28    |
| Positive                                | 76 (98.7)  |      | 0                        | 0                    | 0            |         | 1 (1.3)                  | 1.3                  | 1.3          |         |
| <b>Treatment chemotherapy</b>           | 505        |      | 11                       |                      |              |         | 9                        |                      |              |         |

|                                    |            |      |          |     |     |      |         |     |     |      |
|------------------------------------|------------|------|----------|-----|-----|------|---------|-----|-----|------|
| <b>Intensive</b>                   | 274 (96.1) | 0.99 | 6 (2.1)  | 1.4 | 2.2 | 0.99 | 5 (1.8) | 1.4 | 4.3 | 0.98 |
| <b>Non-intensive</b>               | 231 (96.3) |      | 5 (2.1)  | 1.7 | 2.1 |      | 4 (1.7) | 2.5 | 3.8 |      |
| <b>Inclusion in clinical trial</b> | 505        |      | 11       |     |     |      | 9       |     |     |      |
| <b>No</b>                          | 279 (95.2) | 0.35 | 7 (2.4)  | 1.4 | 2.4 | 0.62 | 7 (2.4) | 1.7 | 5   | 0.31 |
| <b>Yes</b>                         | 226 (97.4) |      | 4 (1.7)  | 1.7 | 1.7 |      | 2 (0.9) | 2.2 | 2.8 |      |
| <b>Use of FLT3 inhibitors</b>      | 505        |      | 11       |     |     |      | 9       |     |     |      |
| <b>No</b>                          | 468 (96.1) | 0.68 | 10 (2.1) | 1.4 | 2.1 | 0.76 | 9 (1.9) | 1.8 | 4.1 | 0.84 |
| <b>Yes</b>                         | 37 (97.4)  |      | 1 (2.6)  | 2.6 | 2.6 |      | 0       | 2.6 | 2.6 |      |

\*This P value compares the crude incidence between the 3 groups

**Supplementary Table S12. 1L cohort (from index date to first refractory/relapse): Crude and cumulative incidence of cardiac events (Fatal vs Non-fatal vs No cardiac event) according to demographic, clinical, and biological characteristics of patients at diagnosis**

|                | No cardiac event | P value* | Fatal cardiac event      |                      |               |         | Non-fatal cardiac event  |                      |               |         |
|----------------|------------------|----------|--------------------------|----------------------|---------------|---------|--------------------------|----------------------|---------------|---------|
| Characteristic | N (%)            |          | Crude incidence<br>N (%) | Cumulative incidence |               |         | Crude incidence<br>N (%) | Cumulative incidence |               |         |
|                |                  |          |                          | At 6 months, %       | At Last FU, % | P value |                          | At 6 months, %       | At Last FU, % | P value |
| <b>N</b>       | 296 (56.4)       |          | 7 (1.3)                  | 1.2                  | 2.8           |         | 222 (42.3)               | 37.8                 | 43.3          |         |
| <b>Age</b>     | 296              |          | 7                        |                      |               |         | 222                      |                      |               |         |

|                                         |            |        |         |     |     |        |            |      |      |        |
|-----------------------------------------|------------|--------|---------|-----|-----|--------|------------|------|------|--------|
| <65 years                               | 165 (62.5) | 0.013  | 4 (1.5) | 1.2 | 3.1 | 0.92   | 95 (36)    | 31.3 | 37.2 | 0.001  |
| ≥65 years                               | 131 (50.2) |        | 3 (1.2) | 1.2 | 1.2 |        | 127 (48.7) | 44.4 | 49.4 |        |
| <b>Relevant cardiologic antecedents</b> | 296        |        | 7       |     |     |        | 222        |      |      |        |
| No                                      | 270 (59.7) | <0.001 | 2 (0.4) | 0.3 | 1.9 | <0.001 | 180 (39.8) | 35.6 | 40.5 | 0.002  |
| Yes                                     | 26 (35.6)  |        | 5 (6.9) | 7.4 | 7.4 |        | 42 (57.5)  | 51.8 | 61   |        |
| <b>All cardiologic antecedents</b>      | 296        |        | 7       |     |     |        | 222        |      |      |        |
| No                                      | 215 (65.6) | <0.001 | 2 (0.6) | 0.4 | 1.9 | 0.02   | 111 (33.8) | 30.2 | 34.6 | <0.001 |
| Yes                                     | 81 (41.1)  |        | 5 (2.5) | 2.7 | 2.7 |        | 111 (56.4) | 50.6 | 58.4 |        |
| <b>Previous anthracycline treatment</b> | 296        |        | 7       |     |     |        | 222        |      |      |        |
| No                                      | 278 (56.5) | 0.05   | 5 (1)   | 0.8 | 2.4 | 0.005  | 209 (42.5) | 37.8 | 43.3 | 0.91   |
| Yes                                     | 18 (54.6)  |        | 2 (6.1) | 7.9 | 7.9 |        | 13 (39.4)  | 37.4 | 37.4 |        |
| <b>ECOG at diagnosis</b>                | 296        |        | 7       |     |     |        | 222        |      |      |        |
| <2                                      | 240 (57.4) | 0.59   | 5 (1.2) | 1   | 2.7 | 0.4    | 173 (41.4) | 36.3 | 42.6 | 0.17   |
| ≥2                                      | 56 (52.3)  |        | 2 (1.9) | 1.9 | 1.9 |        | 49 (45.8)  | 43.5 | 46.4 |        |
| <b>FLT3-ITD status</b>                  | 269        |        | 7       |     |     |        | 209        |      |      |        |
| Negative                                | 222 (54.4) | 0.33   | 7 (1.7) | 1.6 | 3.5 | 0.25   | 179 (43.9) | 38.6 | 45.2 | 0.55   |
| Positive                                | 47 (61)    |        | 0       | 0   | 0   |        | 30 (39)    | 37.7 | 39   |        |
| <b>Treatment chemotherapy</b>           | 296        |        | 7       |     |     |        | 222        |      |      |        |
| Intensive                               | 166 (58.3) | 0.62   | 4 (1.4) | 1.2 | 3.1 | 0.8    | 115 (40.4) | 36   | 41.6 | 0.24   |
| Non-intensive                           | 130 (54.2) |        | 3 (1.3) | 1.3 | 1.3 |        | 107 (44.6) | 39.9 | 45.1 |        |
| <b>Inclusion in clinical trial</b>      | 296        |        | 7       |     |     |        | 222        |      |      |        |
| No                                      | 185 (63.1) | 0.002  | 3 (1)   | 0.7 | 2.4 | 0.28   | 105 (35.8) | 31.5 | 36.6 | <0.001 |

|                               |            |      |         |     |     |      |            |      |      |      |
|-------------------------------|------------|------|---------|-----|-----|------|------------|------|------|------|
| <b>Yes</b>                    | 111 (47.8) |      | 4 (1.7) | 1.9 | 1.9 |      | 117 (50.4) | 45.7 | 51.8 |      |
| <b>Use of FLT3 inhibitors</b> | 296        |      | 7       |     |     |      | 222        |      |      |      |
| <b>No</b>                     | 277 (56.9) | 0.49 | 7 (1.4) | 1.3 | 2.8 | 0.49 | 203 (41.7) | 37   | 42.6 | 0.25 |
| <b>Yes</b>                    | 19 (50)    |      | 0       | 0   | 0   |      | 19 (50)    | 47.4 | 50   |      |

\*This P value compares the crude incidence between the 3 groups

**Supplementary Table S13. 1L cohort: Multivariate analyses of prognostic factors for development of non-fatal cardiac events**

| Covariate                        | Unfavorable category | Univariate Analysis | Multivariate Analysis |         |
|----------------------------------|----------------------|---------------------|-----------------------|---------|
|                                  |                      | P value             | HR (95% CI)           | P value |
| Age                              | ≥65                  | 0.001               | 1.8 (1.2-2.9)         | 0.007   |
| ECOG                             | >2                   | 0.17                | 1.3 (1-1.9)           | 0.08    |
| Relevant cardiologic antecedents | Yes                  | <0.001              | 1.9 (1.4-2.6)         | <0.001  |
| Front-line treatment             | Non-intensive        | 0.24                | 1.9 (1.2-3)           | 0.005   |
| Clinical trial                   | Yes                  | <0.001              | 1.2 (0.6-1.2)         | 0.41    |
| Use of FLT3 inhibitors           | Yes                  | 0.25                | 1.3 (0.7-2.2)         | 0.37    |

Abbreviations: HR: hazard ratio; CI: confidence interval

**Supplementary Figure S1. Distribution of age at baseline AML diagnosis (diagnosed patients from HULaFe; n=571).**

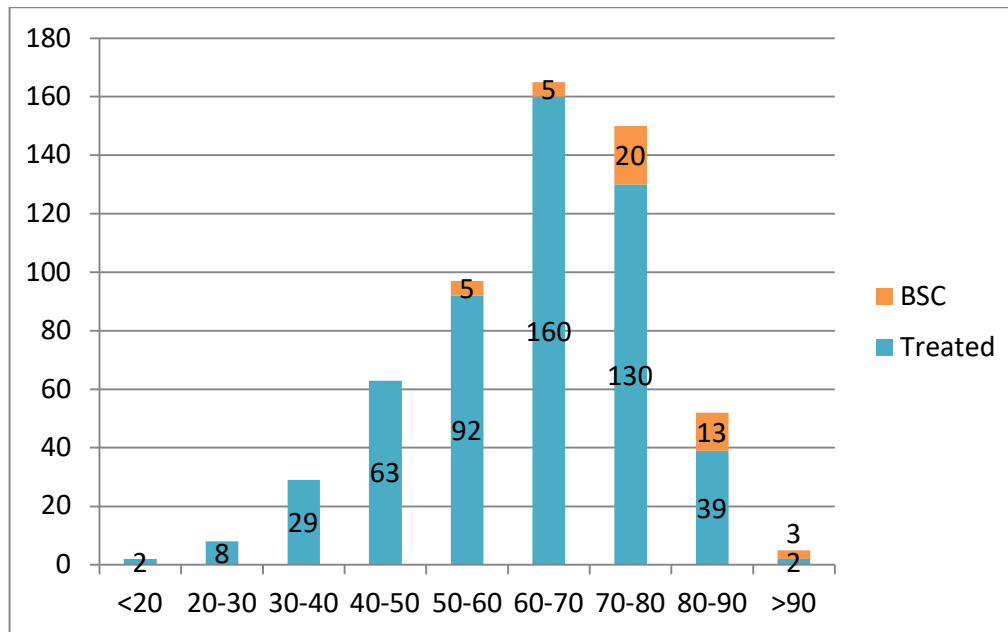

**Supplementary Figure S2. Timing of life-threatening (requiring intensive management) cardiac events in the overall cohort.**

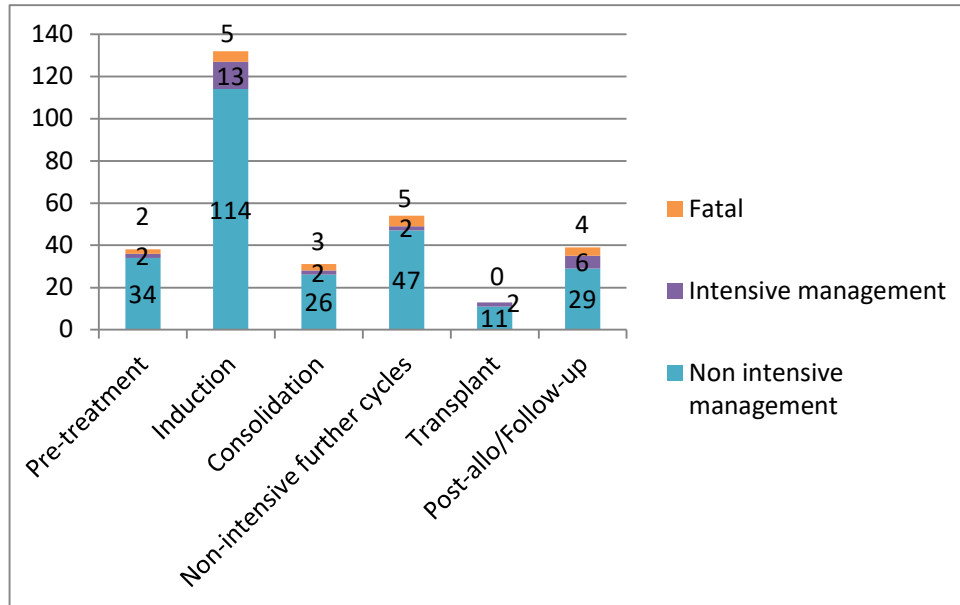

**Supplementary Figure S3. Timing of QTcF prolongation events in the overall cohort.**

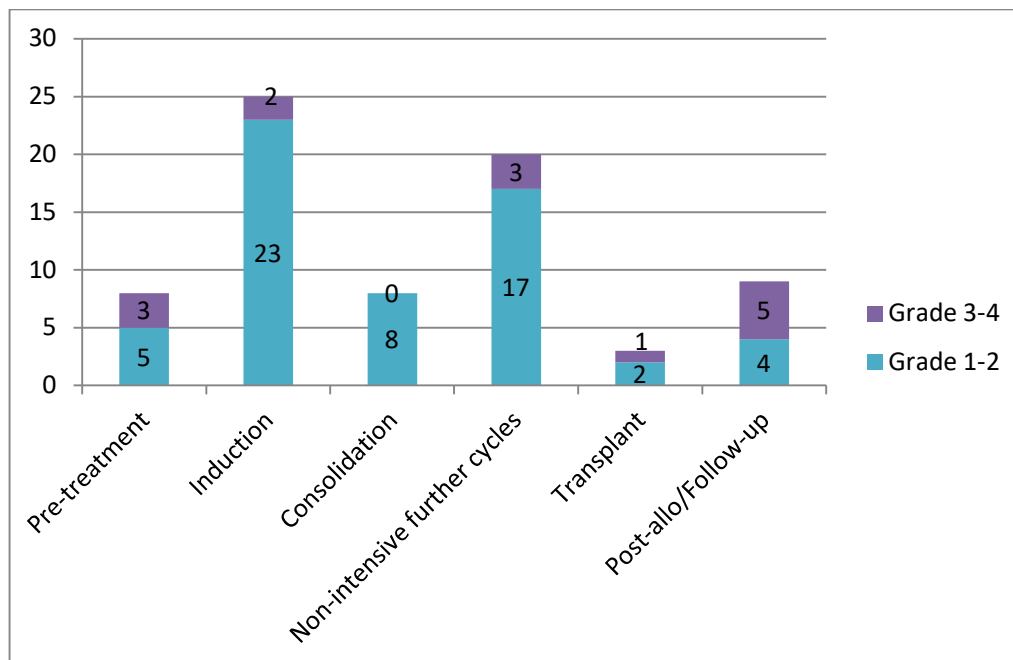

**Supplementary Figure S4. Timing of arrhythmia events in the overall cohort.**

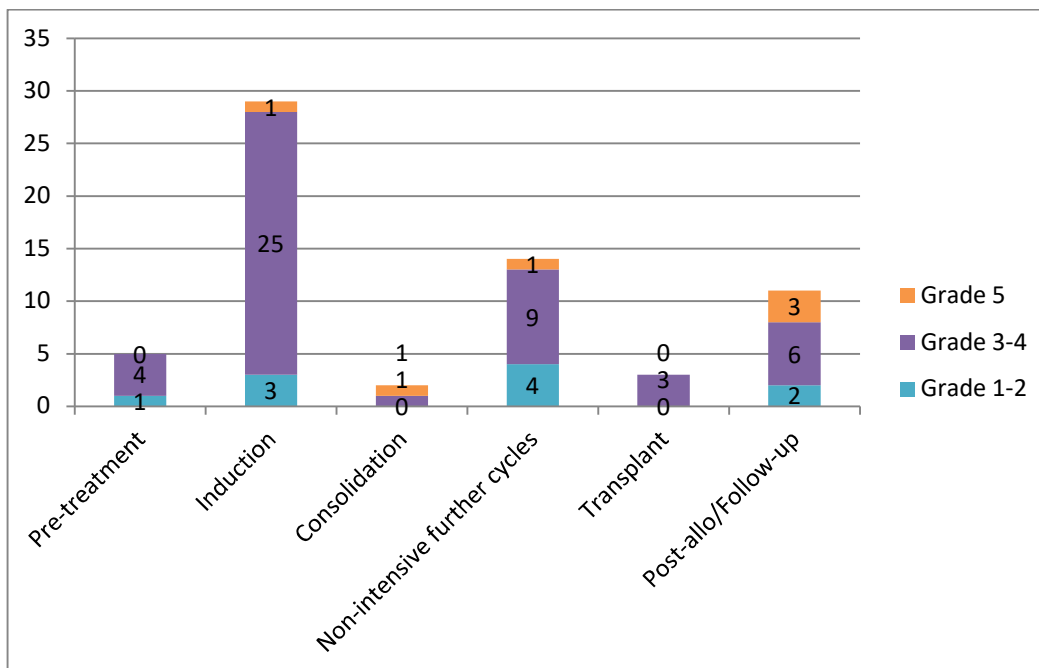

**Supplementary Figure S5. Timing of heart failure events in the overall cohort.**

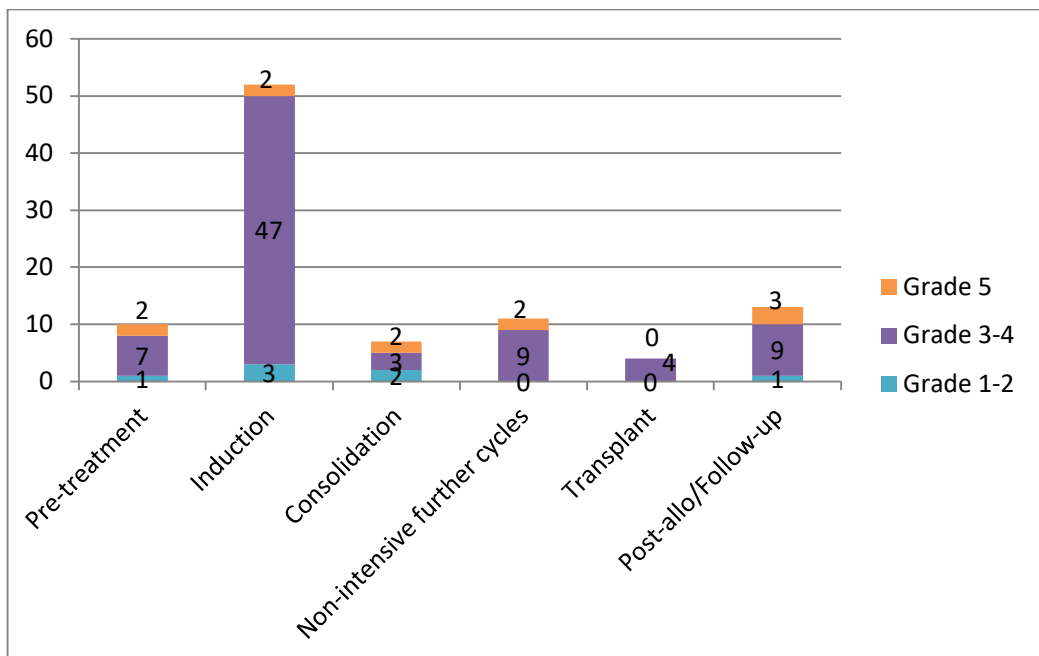

Supplement: s1 [file s1]
